# Supplementary material for: Co2+ detection, cell imaging, and temperature sensing based on excitation-independent green-fluorescent N-doped carbon dots
Source: Royal Society of Chemistry journal article supplement (doi:10.1039/c9ra09405a), 2019-01-01
Supplement: c9ra09405a1.pdf [file c9ra09405a1.pdf]

## Supplementary Materials for:

### Co<sup>2+</sup> detection, cell imaging, and temperature sensing based on excitation-independent green-fluorescent N-doped carbon dots

Lihong Shi<sup>a,\*</sup>, Dan Chang<sup>a</sup>, Guomei Zhang<sup>a</sup>, Caihong Zhang<sup>a</sup>, Yan Zhang<sup>a</sup>, Chuan Dong<sup>a</sup>, Lanling Chu<sup>b</sup> and  
Shaomin Shuang<sup>a,\*</sup>

#### Apparatus

Transmission electron microscopy (TEM) study was carried out in a JEOL JEM-2100 instrument operating at an accelerating voltage of 200 KV. Samples for TEM measurements were prepared by placing a drop of colloidal solution on carbon-coated copper grid and then dried at room temperature. UV–vis absorption spectra were recorded by HITACHI U-2910 UV. Fluorescence spectra were operated with Hitachi F-4500 fluorescence spectrophotometer (Tokyo, Japan). Fourier Transform infrared (FTIR) spectrum was recorded on Bruker tensor 2 spectrometer using a resolution of 4 cm<sup>-1</sup>. The sample with 1 mg diluted by KBr (ratio 1:200) was pressed into the disc. X-ray photoelectron spectroscopy (XPS) data were obtained with an AXIS ULTRA DLD electron spectrometer from Shimadzu Company using 300W Al K $\alpha$  radiation.

#### MTT assay

Cell viability of SMMC-7721 cells was evaluated using the MTT assay. Cells were seeded on 96-well plates with a density of  $5 \times 10^4$  cells/mL in 100  $\mu$ L of medium and then were exposed to different concentrations of obtained N-CDs for 24 h. Following incubation, 10  $\mu$ L of MTT (5 mg/ml) was added to each well. After 4 h of incubation at 37 °C, the culture medium was removed and 100  $\mu$ L of dimethyl sulphoxide (DMSO, Sangon Biotech, Shanghai, China) was added to dissolve the formazan crystals. The absorbance was measured at 570 nm using a microplate reader (Infinite M200 Pro, Tecan, Switzerland), and the cell viability was expressed as a percentage of the value of the untreated group.

---

<sup>a</sup>College of Chemistry and Chemical Engineering, Shanxi University,  
Taiyuan 030006, PR China

<sup>b</sup>School of Light Industry and Food Engineering, Nanjing Forestry  
University, Jiangsu Province, 210037, China

\* Corresponding author. E-mail address: [shilihong@sxu.edu.cn](mailto:shilihong@sxu.edu.cn),  
[smshuang@sxu.edu.cn](mailto:smshuang@sxu.edu.cn)

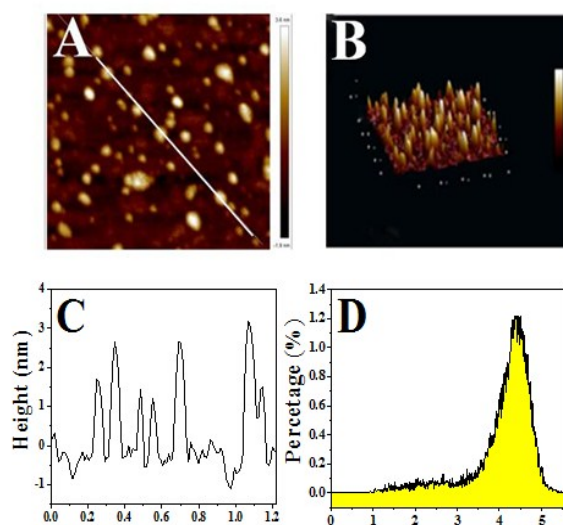

**Fig. S1** (A) AFM topography image of N-CDs. (B) AFM three-dimensional image of N-CDs. (C) Height profile along the line in AFM topography image. (D) Height distribution of N-CDs.

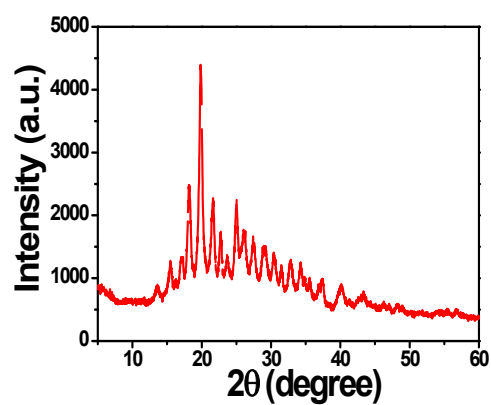

**Fig. S2** XRD pattern of obtained N-CDs.

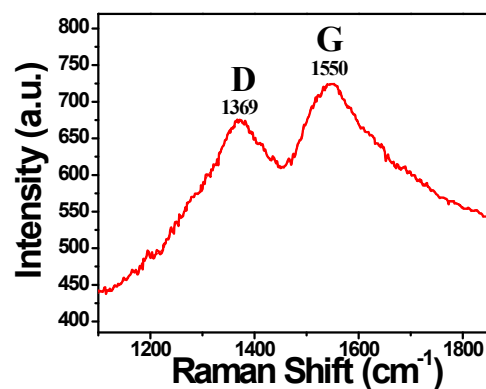

**Fig. S3** Raman spectra of N-CDs.

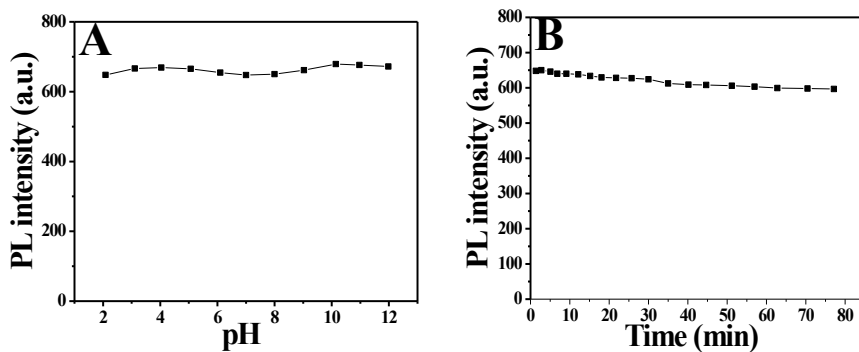

**Fig. S4** (A) Response of pH on the PL intensity of obtained N-CDs. (B) Response of excitation time on the PL intensity of obtained N-CDs.

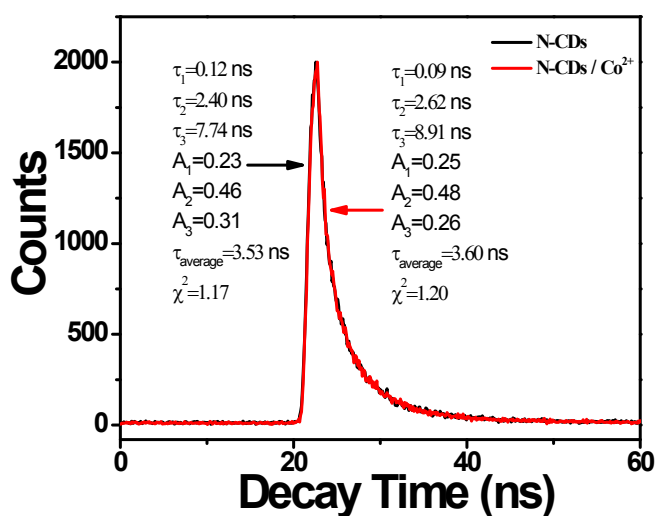

**Fig. S5** Fluorescence decay of N-CDs and N-CDs/Co<sup>2+</sup>.

**Table S1** Comparison of different fluorescent CDs based probes for Co<sup>2+</sup> detection.

| Starting material of synthesis                       | Range                  | Detection limit | Ref.      |
|------------------------------------------------------|------------------------|-----------------|-----------|
| pigskin                                              | 1 $\mu$ M–100 $\mu$ M  | 0.68 $\mu$ M    | [1]       |
| 2, 4, 6-Tris (2'-pyridyl)-s-triazine and citric acid | 0.4 $\mu$ M–50 $\mu$ M | 0.23 $\mu$ M    | [2]       |
| acrylic acid and ethylenediamine                     | 1.0 $\mu$ M–60 $\mu$ M | 0.25 $\mu$ M    | [3]       |
| kelp                                                 | 1 $\mu$ M–200 $\mu$ M  | 0.39 $\mu$ M    | [4]       |
| Carbopol 934 and diethylenetriamine                  | 0 $\mu$ M–40 $\mu$ M   | 0.45 $\mu$ M    | [5]       |
| Tyrosine and urea                                    | 0.1 $\mu$ M–10 $\mu$ M | 0.15 $\mu$ M    | This work |

## References

- 1 X. Wen, L. Shi, G. Wen, Y. Li, C. Dong, J. Yang and S. Shuang, *Sens. Actuators B Chem.*, 2016, **235**, 179–187.
- 2 R. Tabaraki, N. Sadeghinejad and A. Nateghi, *J. Fluoresc.*, 2018, **28**, 251–257.
- 3 N. Jing, M. Tian, Y. Wang and Y. Zhang, *J. Lumin.*, 2019, **206**, 169–175.
- 4 C. Zhao, X. Li, C. Cheng, Y. Yang, *Microchemical Journal.*, 2019, **147**, 183–190.
- 5 D. Kong, F. Yan, Z. Han, J. Xu, X. Guo and L. Chen, *RSC Adv.*, 2016, **6**, 67481–67487.
